# Supplementary material for: Female Predominance and Transmission Distortion in the Long-QT Syndrome
Source: Atypon-hosted journal article supplement (doi:10.1056/nejmoa042786), 2006-12-27
Supplement: nejm_imboden_2744sa1.pdf [file nejm_imboden_2744sa1.pdf]

## Supplementary Appendix

This appendix has been provided by the authors to give readers additional information about their work.

Supplement to: Imboden M, Swan H, Denjoy I, et al. Female predominance and transmission distortion in the long-QT syndrome. *N Engl J Med* 2006;355:2744-51.

**Online Table: List of LQT1 and LQT2 mutations, frequency of occurrence in independent pedigrees, LQTS referral center and mutation classification.**

N: N-terminal missense mutation group, C: C-terminal missense mutation, TM: Transmembrane missense mutation, X/sp: nonsense, splicing, and deletion, insertion mutation group

D –Germany, F –France, FIN –Finland, I –Italy, NL –Netherlands

**LQT1**

| mutation      | Pedigrees (n) | center | mutation type |
|---------------|---------------|--------|---------------|
| P117L         | 1             | I      | N             |
| G168R         | 1             | F      | TM            |
| R174C         | 4             | F      | TM            |
| R174H         | 2             | F      | TM            |
| L175fsX240    | 1             | F      | X/sp          |
| A178T         | 1             | D      | TM            |
| Y184S         | 2             | NL     | TM            |
| R190W         | 1             | I      | TM            |
| R190Q         | 3             | D/F    | TM            |
| R190L         | 1             | D      | TM            |
| S225L         | 3             | D/F/I  | TM            |
| R231C         | 1             | F      | TM            |
| R243C         | 1             | F      | TM            |
| V254M         | 4             | D/F    | TM            |
| H258N         | 1             | I      | TM            |
| H258P         | 1             | F      | TM            |
| E261K         | 1             | F      | TM            |
| G269D         | 1             | F      | TM            |
| S277W         | 1             | D      | TM            |
| V280A         | 1             | D      | TM            |
| V280E         | 1             | I      | TM            |
| V288fsX347    | 1             | F      | X/sp          |
| G306R         | 1             | F      | TM            |
| T309R         | 1             | F      | TM            |
| T311I         | 1             | F      | TM            |
| T312I         | 1             | D      | TM            |
| G314S         | 4             | D/F/I  | TM            |
| Y315S         | 3             | F      | TM            |
| Y315C         | 1             | F      | TM            |
| G316E         | 2             | F      | TM            |
| P320H         | 1             | D      | TM            |
| P320A         | 2             | F      | TM            |
| G325R         | 2             | F      | TM            |
| F339S         | 1             | F      | TM            |
| A341V         | 4             | D/F/I  | TM            |
| L342F         | 1             | F      | TM            |
| A344V         | 4             | F/NL   | TM            |
| sp/A344A      | 4             | F/I    | X/sp          |
| Q359-K362 Del | 1             | F      | X/sp          |
| R366W         | 2             | F      | C             |
| A371T         | 1             | F      | C             |
| S373P         | 1             | NL     | C             |
| W379S         | 1             | NL     | C             |

|                |    |     |      |
|----------------|----|-----|------|
| K422fsX462     | 2  | F   | X/sp |
| M476L          | 1  | F   | C    |
| M520R          | 1  | D   | C    |
| R539W          | 1  | F   | C    |
| R555C          | 4  | F   | C    |
| R555H          | 1  | F   | C    |
| S566P          | 1  | F   | C    |
| I567T          | 1  | F   | C    |
| T587M          | 1  | D   | C    |
| G589D          | 50 | FIN | C    |
| A590T          | 1  | F   | C    |
| R591H          | 2  | F   | C    |
| R594C          | 1  | NL  | C    |
| Q604X          | 1  | F   | X/sp |
| IVS6as -1G>C   | 1  | F   | X/sp |
| ISV6ds+2del 19 | 1  | F   | X/sp |

## LQT2

| <b>mutation</b> | <b>pedigrees<br/>(n)</b> | <b>center</b> | <b>mutation<br/>type</b> |
|-----------------|--------------------------|---------------|--------------------------|
| R27fsX 59       | 1                        | F             | X/sp                     |
| Y43C            | 1                        | I             | N                        |
| C44F            | 1                        | F             | N                        |
| C44G            | 1                        | D             | N                        |
| E58K            | 1                        | F             | N                        |
| C64Y            | 1                        | NL            | N                        |
| L87P            | 2                        | NL            | N                        |
| Y99S            | 1                        | NL            | N                        |
| R100G           | 1                        | F             | N                        |
| P114S           | 1                        | F             | N                        |
| A157fsX332      | 1                        | F             | X/sp                     |
| R176W           | 1                        | D             | N                        |
| R232fsX359      | 1                        | NL            | X/sp                     |
| S261N           | 1                        | F             | N                        |
| P297S           | 1                        | NL            | N                        |
| R328C           | 1                        | F             | N                        |
| P334L           | 1                        | F             | N                        |
| T337fsX355      | 1                        | F             | X/sp                     |
| R366X           | 1                        | D             | X/sp                     |
| P426H           | 1                        | I             | TM                       |
| S428L           | 1                        | D             | TM                       |
| M462-I467 Dup   | 1                        | F             | X/sp                     |
| F463L           | 1                        | F             | TM                       |
| P486R           | 1                        | D             | TM                       |
| D501N           | 1                        | F             | TM                       |
| D509N           | 1                        | I             | TM                       |
| L552S           | 8                        | FIN           | TM                       |
| L553V           | 1                        | F             | TM                       |
| F557fsX564      | 1                        | D             | X/sp                     |

|               |   |      |      |
|---------------|---|------|------|
| A558P         | 1 | NL   | TM   |
| A561V         | 1 | I    | TM   |
| A561T         | 1 | F    | TM   |
| W563X         | 1 | F    | X/sp |
| A565S         | 1 | F    | TM   |
| W568C         | 1 | F    | TM   |
| W568X         | 1 | D    | X/sp |
| G572S         | 1 | I    | TM   |
| G572D         | 2 | I    | TM   |
| H578-R582 Del | 1 | NL   | X/sp |
| R582C         | 1 | NL   | TM   |
| G584S         | 1 | I    | TM   |
| D609N         | 1 | F    | TM   |
| Y611X         | 1 | D    | X/sp |
| T613M         | 3 | F/NL | TM   |
| A614V         | 4 | D/I  | TM   |
| V625E         | 1 | NL   | TM   |
| G626-F627insP | 1 | NL   | X/sp |
| G628S         | 1 | I    | TM   |
| N633S         | 1 | F    | TM   |
| T634A         | 1 | F    | TM   |
| K638Q         | 1 | D    | TM   |
| S649L         | 1 | NL   | TM   |
| S660L         | 1 | I    | TM   |
| Q664X         | 1 | F    | X/sp |
| Q676fsX721    | 1 | NL   | X/sp |
| Q688X         | 1 | D    | X/sp |
| E698X         | 1 | NL   | X/sp |
| W705 fsX713 2 | 1 | F    | X/sp |
| R752P         | 1 | D    | C    |
| S783P         | 1 | F    | C    |
| R784fsX808    | 1 | NL   | X/sp |
| S818L         | 1 | F    | C    |
| S818P         | 1 | I    | C    |
| V822M         | 1 | F    | C    |
| R863X         | 1 | NL   | X/sp |
| P872fsX876    | 1 | NL   | X/sp |
| R883Q         | 1 | D    | C    |
| W927X         | 1 | NL   | X/sp |
| I933A>C       | 1 | NL   | C    |
| S960N         | 1 | F    | C    |
| S981fsX1056   | 1 | F    | X/sp |
| L987fsX1056   | 1 | NL   | X/sp |
| W1001X        | 1 | F    | X/sp |
| D1003fsX1118  | 1 | D    | X/sp |
| R1014fsX1052  | 1 | D    | X/sp |
| P1034fsX1058  | 1 | D    | X/sp |
| D1037fsX1118  | 1 | F    | X/sp |
| R1055Q        | 1 | D    | C    |
| Q1068X        | 1 | F    | X/sp |
| R1084fsX1254  | 1 | F    | X/sp |
| IVS6as -1 g>c | 1 | F    | X/sp |

|                   |   |   |      |
|-------------------|---|---|------|
| IVS3 -2ins(agGCC) | 1 | D | X/sp |
| IVS8as -2a>9      | 1 | F | X/sp |

**Online Table: List of LQT1 and LQT2 mutations, frequency of occurrence in independent pedigrees, LQTS referral center and mutation classification.**

N: N-terminal missense mutation group, C: C-terminal missense mutation, TM: Transmembrane missense mutation, X/sp: nonsense, splicing, and deletion, insertion mutation group

D –Germany, F –France, FIN –Finland, I –Italy, NL –Netherlands

**LQT1**

| <b>mutation</b> | <b>Pedigrees<br/>(n)</b> | <b>center</b> | <b>mutation<br/>type</b> |
|-----------------|--------------------------|---------------|--------------------------|
| P117L           | 1                        | I             | N                        |
| G168R           | 1                        | F             | TM                       |
| R174C           | 4                        | F             | TM                       |
| R174H           | 2                        | F             | TM                       |
| L175fsX240      | 1                        | F             | X/sp                     |
| A178T           | 1                        | D             | TM                       |
| Y184S           | 2                        | NL            | TM                       |
| R190W           | 1                        | I             | TM                       |
| R190Q           | 3                        | D/F           | TM                       |
| R190L           | 1                        | D             | TM                       |
| S225L           | 3                        | D/F/I         | TM                       |
| R231C           | 1                        | F             | TM                       |
| R243C           | 1                        | F             | TM                       |
| V254M           | 4                        | D/F           | TM                       |
| H258N           | 1                        | I             | TM                       |
| H258P           | 1                        | F             | TM                       |
| E261K           | 1                        | F             | TM                       |
| G269D           | 1                        | F             | TM                       |
| S277W           | 1                        | D             | TM                       |
| V280A           | 1                        | D             | TM                       |
| V280E           | 1                        | I             | TM                       |
| V288fsX347      | 1                        | F             | X/sp                     |
| G306R           | 1                        | F             | TM                       |
| T309R           | 1                        | F             | TM                       |
| T311I           | 1                        | F             | TM                       |
| T312I           | 1                        | D             | TM                       |
| G314S           | 4                        | D/F/I         | TM                       |
| Y315S           | 3                        | F             | TM                       |
| Y315C           | 1                        | F             | TM                       |
| G316E           | 2                        | F             | TM                       |
| P320H           | 1                        | D             | TM                       |
| P320A           | 2                        | F             | TM                       |
| G325R           | 2                        | F             | TM                       |
| F339S           | 1                        | F             | TM                       |
| A341V           | 4                        | D/F/I         | TM                       |
| L342F           | 1                        | F             | TM                       |
| A344V           | 4                        | F/NL          | TM                       |
| sp/A344A        | 4                        | F/I           | X/sp                     |
| Q359-K362 Del   | 1                        | F             | X/sp                     |
| R366W           | 2                        | F             | C                        |
| A371T           | 1                        | F             | C                        |
| S373P           | 1                        | NL            | C                        |
| W379S           | 1                        | NL            | C                        |

|                 |    |     |      |
|-----------------|----|-----|------|
| K422fsX462      | 2  | F   | X/sp |
| M476L           | 1  | F   | C    |
| M520R           | 1  | D   | C    |
| R539W           | 1  | F   | C    |
| R555C           | 4  | F   | C    |
| R555H           | 1  | F   | C    |
| S566P           | 1  | F   | C    |
| I567T           | 1  | F   | C    |
| T587M           | 1  | D   | C    |
| G589D           | 50 | FIN | C    |
| A590T           | 1  | F   | C    |
| R591H           | 2  | F   | C    |
| R594C           | 1  | NL  | C    |
| Q604X           | 1  | F   | X/sp |
| IVS5as -1G>C    | 1  | F   | X/sp |
| IVS5ds +2del 19 | 1  | F   | X/sp |

## LQT2

| <b>mutation</b> | <b>pedigrees<br/>(n)</b> | <b>center</b> | <b>mutation<br/>type</b> |
|-----------------|--------------------------|---------------|--------------------------|
| R27fsX 59       | 1                        | F             | X/sp                     |
| Y43C            | 1                        | I             | N                        |
| C44F            | 1                        | F             | N                        |
| C44G            | 1                        | D             | N                        |
| E58K            | 1                        | F             | N                        |
| C64Y            | 1                        | NL            | N                        |
| L87P            | 2                        | NL            | N                        |
| Y99S            | 1                        | NL            | N                        |
| R100G           | 1                        | F             | N                        |
| P114S           | 1                        | F             | N                        |
| P157fsX332      | 1                        | F             | X/sp                     |
| R176W           | 1                        | D             | N                        |
| R232fsX359      | 1                        | NL            | X/sp                     |
| P297S           | 1                        | NL            | N                        |
| R328C           | 1                        | F             | N                        |
| P334L           | 1                        | F             | N                        |
| T337fsX355      | 1                        | F             | X/sp                     |
| R366X           | 1                        | D             | X/sp                     |
| P426H           | 1                        | I             | TM                       |
| S428L           | 1                        | D             | TM                       |
| M462-I467 Dup   | 1                        | F             | X/sp                     |
| F463L           | 1                        | F             | TM                       |
| P486R           | 1                        | D             | TM                       |
| D501N           | 1                        | F             | TM                       |
| D509N           | 1                        | I             | TM                       |
| L552S           | 8                        | FIN           | TM                       |
| L553V           | 1                        | F             | TM                       |
| F557fsX564      | 1                        | D             | X/sp                     |
| A558P           | 1                        | NL            | TM                       |
| A561V           | 1                        | I             | TM                       |
| A561T           | 1                        | F             | TM                       |

|                   |   |      |      |
|-------------------|---|------|------|
| W563X             | 1 | F    | X/sp |
| A565S             | 1 | F    | TM   |
| W568C             | 1 | F    | TM   |
| W568X             | 1 | D    | X/sp |
| G572S             | 1 | I    | TM   |
| G572D             | 2 | I    | TM   |
| H578-R582 Del     | 1 | NL   | X/sp |
| R582C             | 1 | NL   | TM   |
| G584S             | 1 | I    | TM   |
| D609N             | 1 | F    | TM   |
| Y611X             | 1 | D    | X/sp |
| T613M             | 3 | F/NL | TM   |
| A614V             | 4 | D/I  | TM   |
| S621N             | 1 | F    | N    |
| V625E             | 1 | NL   | TM   |
| G626-F627insP     | 1 | NL   | X/sp |
| G628S             | 1 | I    | TM   |
| N633S             | 1 | F    | TM   |
| T634A             | 1 | F    | TM   |
| K638Q             | 1 | D    | TM   |
| S649L             | 1 | NL   | TM   |
| S660L             | 1 | I    | TM   |
| Q664X             | 1 | F    | X/sp |
| Q676fsX721        | 1 | NL   | X/sp |
| Q688X             | 1 | D    | X/sp |
| E698X             | 1 | NL   | X/sp |
| W705 fsX713       | 1 | F    | X/sp |
| R752P             | 1 | D    | C    |
| S783P             | 1 | F    | C    |
| R784fsX808        | 1 | NL   | X/sp |
| S818L             | 1 | F    | C    |
| S818P             | 1 | I    | C    |
| V822M             | 1 | F    | C    |
| R863X             | 1 | NL   | X/sp |
| P872fsX876        | 1 | NL   | X/sp |
| R883Q             | 1 | D    | C    |
| W927X             | 1 | NL   | X/sp |
| I933A>C           | 1 | NL   | C    |
| S960N             | 1 | F    | C    |
| S981fsX1056       | 1 | F    | X/sp |
| L987fsX1056       | 1 | NL   | X/sp |
| W1001X            | 1 | F    | X/sp |
| D1003fsX1118      | 1 | D    | X/sp |
| R1014fsX1052      | 1 | D    | X/sp |
| P1034fsX1058      | 1 | D    | X/sp |
| D1037fsX1118      | 1 | F    | X/sp |
| R1055Q            | 1 | D    | C    |
| Q1068X            | 1 | F    | X/sp |
| P1084fsX1254      | 1 | F    | X/sp |
| IVS6as -1 g>c     | 1 | F    | X/sp |
| IVS3 -2ins(agGCC) | 1 | D    | X/sp |
| IVS8as -2a>9      | 1 | F    | X/sp |
